# Supplementary material
Source: PubMed Central journal article supplement (PMC4851989)
Supplement: supp_kwv256_kwv256supp.pdf [file supp_kwv256_kwv256supp.pdf]

**Web Table 1.** Associations<sup>a</sup> Between Exposure to PM<sub>2.5</sub> and NO<sub>2</sub> During Pregnancy and Percentage change (95% Confidence Interval) in Cord Blood Leptin and Adiponectin Levels With Additional Adjustment for Annual Household Income by Quartile and Interquartile Range Increase Among Participants in the MIREC Study, Canada, 2008-2011.

| Pollutant                              | Leptin                |            | Adiponectin           |            |
|----------------------------------------|-----------------------|------------|-----------------------|------------|
|                                        | Percentage change (%) | 95% CI (%) | Percentage change (%) | 95% CI (%) |
| PM <sub>2.5</sub> (µg/m <sup>3</sup> ) |                       |            |                       |            |
| (3.3-6.0) <sup>b</sup>                 | 1.0                   |            | 1.0                   |            |
| (6.0-8.3) <sup>c</sup>                 | 25                    | 9, 41      | 19                    | 8, 30      |
| (8.3-9.2) <sup>d</sup>                 | 13                    | -3, 29     | 13                    | 2, 24      |
| (9.2-11.6) <sup>e</sup>                | 21                    | 5, 37      | 20                    | 9, 31      |
| IQR (3.2)                              | 11                    | 1, 21      | 11                    | 5, 18      |
| NO <sub>2</sub> (ppb)                  |                       |            |                       |            |
| (3.7-7.1) <sup>b</sup>                 | 1.0                   |            | 1.0                   |            |
| (7.1-13.7) <sup>c</sup>                | -5                    | -21, 12    | 12                    | 1, 23      |
| (13.7-20.7) <sup>d</sup>               | 4                     | -13, 21    | 13                    | 1, 25      |
| (20.7-41.4) <sup>e</sup>               | 10                    | -7, 27     | 22                    | 11, 34     |
| IQR (13.6)                             | 11                    | 1, 22      | 13                    | 6, 20      |
| Multipollutant model                   |                       |            |                       |            |
| IQR (3.2) PM <sub>2.5</sub>            | 0                     | -13, 13    | 9                     | 0, 17      |
| IQR (13.6) NO <sub>2</sub>             | 11                    | -1, 24     | 9                     | 0, 17      |

Abbreviations: CI, confidence interval; IQR, interquartile range; NO<sub>2</sub>, nitrogen dioxide; PM<sub>2.5</sub>, particulate matter with an aerodynamic diameter less than or equal to 2.5 µm; Q, quartile

<sup>a</sup>Adjusted for maternal age, parity, pre-pregnancy BMI, birth weight z-score, infant sex and annual household income.

<sup>b</sup>Quartile 1

<sup>c</sup>Quartile 2

<sup>d</sup>Quartile 3

<sup>e</sup>Quartile 4
